# Supplementary material
Source: ML conference proceedings conference paper supplement (https://openreview.net/forum?id=kUkp7WdUny9)
Supplement: supplementary_material [file attachment]

# Appendix for SODA10M: Towards Large-Scale Object Detection Benchmark for Autonomous Driving

## A SODA10M dataset

We publish the SODA10M dataset, benchmark, data format and annotation instructions at our website <https://soda-2d.github.io>. It is our priority to protect the privacy of third parties. We bear all responsibility in case of violation of rights, etc., and confirmation of the data license.

**License, Terms of use, Terms of privacy.** The SODA10M dataset is published under CC BY-NC-SA 4.0 license, which means everyone can use this dataset for non-commercial research purpose. Find more details in Appendix F.

**Dataset documentation.** <https://soda-2d.github.io/documentation.html> shows the dataset documentation and intended uses.

**Data maintenance.** <https://soda-2d.github.io/download.html> provides data download links for users (in Google Drive & Baidu YunPan). We will maintain the data for a long time and check the data accessibility in a regular basis. We also plan to extend the scale of unlabeled data to a 100-million level to help develop robust models.

**Benchmark and code.** The codebases used in our benchmark are open-source. More details of the reproduction code and experiment settings are illustrated in Appendix B.

**Data format & Evaluation metrics.** Annotation files in SODA10M are stored in standard COCO format, which can be easily accessible to most object detection codebases. We follow the popular COCO API [14] to utilize the Average Precision metric for evaluating detection performance.

**Limitations.** The major limitation of SODA10M is that some domains exist in the unlabeled set but not in labeled sets, which raises the problem that we can not verify the domain adaptation abilities in these domains. To overcome the limitation, we plan to provide more labeled data in these domains in the future.

## B Implement Details

In order to make the experiment results reproducible, we further provide detailed experimental settings for each method in this paper. The basic differences compared with default setting is that class number is set to 6, syncBN is on and multi-scale training (in supervised and semi-supervised methods) is utilized with scale  $1920 \times (864, 907.2, 950.4, 993.6, 1036.8, 1080)$ . Without specifying, all self-supervised and semi-supervised methods adopt ResNet50 [12] backbone. Our models are trained on servers with 8 Nvidia V100 GPU(32GB) cards with Intel Xeon Platinum 8168 CPU(2.70GHz).

### B.1 Open-Source Codebase

Table 1: The codebases used in our benchmark.

| Codebase              | link                                                                                                                    |
|-----------------------|-------------------------------------------------------------------------------------------------------------------------|
| Detectron2 [21]       | <a href="https://github.com/facebookresearch/detectron2">https://github.com/facebookresearch/detectron2</a>             |
| PVT [19]              | <a href="https://github.com/whai362/PVT">https://github.com/whai362/PVT</a>                                             |
| OpenSelfSup           | <a href="https://github.com/open-mmlab/OpenSelfSup">https://github.com/open-mmlab/OpenSelfSup</a>                       |
| VINCE [9]             | <a href="https://github.com/danielgordon10/vince">https://github.com/danielgordon10/vince</a>                           |
| STAC [17]             | <a href="https://github.com/google-research/ssl_detection">https://github.com/google-research/ssl_detection</a>         |
| Unbiased Teacher [15] | <a href="https://github.com/facebookresearch/unbiased-teacher">https://github.com/facebookresearch/unbiased-teacher</a> |

## B.2 Supervised Methods

For the 1x schedule, the learning rate is set to 0.02, decreased by a factor of 10 at 8th, 11th epoch of total 12 epochs. Random crop is used as the only data augmentation method and SGD optimizer is adopted with momentum set as 0.9.

Table 2: Implement details for supervised learning benchmark on SODA10M with 8 Tesla V100.

| Model                | Train split | Default Setting | Difference                                       | GPU hours       |
|----------------------|-------------|-----------------|--------------------------------------------------|-----------------|
| RetinaNet [13] 1x    | train set   | Detectron2      | 1. backbone no freeze.<br>2. turn on precise_bn. | $0.78 \times 8$ |
| Faster RCNN [16] 1x  | train set   | Detectron2      | same as above                                    | $0.83 \times 8$ |
| Cascaded RCNN [2] 1x | train set   | Detectron2      | same as above                                    | $0.92 \times 8$ |

## B.3 Self-supervised Methods

For self-supervised methods, considering time limit, 5-million unlabeled images (split 0, 2, 4, 6, 8) of SODA10M are used, while we also make full use of the other 5-million subset in a sequential training manner (mentioned in †). We follow the standard data augmentation pipeline adopted by MoCov2 [5], which consists of random resized crop, color jitter, gaussian blur and random horizontal flip, for all considered models except MoCov1 [11], which implements all augmentations except gaussian blur. Auto Augmentation [7] is further used in DetCo [22] following the original paper. Cosine learning rate decay is adopted for all models except MoCov1, which uses step-wise learning rate decay to decrease learning rate by 10x at 40 and 50 epochs. The base learning rates are 0.03, 0.03, 0.3, 4.8, 0.06, 0.03 sequentially for the models in Table 3. LARS optimizer [23] is used in SimCLR [4], while all other models implement SGD optimizer with momentum set as 0.9.

Table 3: Implement details for semi-supervised learning benchmark on SODA10M with 8 Tesla V100.

| Model                                                         | Train split                       | Default Setting | Difference                              | GPU days        |
|---------------------------------------------------------------|-----------------------------------|-----------------|-----------------------------------------|-----------------|
| MoCov1 [11], MoCov2 [5], SimCLR [4], SwAV [3], DenseCL [20]   | 5-million unlabeled               | OpenSelfSup     | 60 epochs                               | $8.40 \times 8$ |
| DetCo [22]                                                    | 5-million unlabeled               | OpenSelfSup     | same as above                           | $14.1 \times 8$ |
| MoCov1 [11]†, MoCov2 [5]†, SimCLR [4]†                        | 10-million unlabeled              | OpenSelfSup     | same as above                           | $16.8 \times 8$ |
| MoCov1 [11], MoCov2 [5], SimCLR [4], BYOL [10] on PVT         | 5-million unlabeled               | OpenSelfSup     | same as above                           | $8.60 \times 8$ |
| MoCov1 [11], MoCov2 [5], VINCE [9], VINCE+Jigsaw [9] on VIDEO | 5-million unlabeled to 90k videos | VINCE           | 1. 800 epochs<br>2. VINCE augmentations | $2.80 \times 8$ |

When finetuning on SODA10M labeled set and other datasets (Cityscape [6] & BDD100K [24]), the setting keeps consistent with the supervised methods and MoCo [11] respectively.

## B.4 Semi-supervised Methods

For semi-supervised methods, considering the time limit, only 1-million unlabeled images (split 0) of SODA10M are used. Compared with self-supervised methods, semi-supervised methods are much more efficient. The learning rate of pseudo labeling, STAC [17] and unbiased teacher [15] is set to 0.02, 0.01 and 0.02 respectively. Random crop is used as the only data augmentation method and SGD optimizer is adopted with momentum set as 0.9.

Table 4: Implement details for semi-supervised learning benchmark on SODA10M with 8 Tesla V100.

| Model                 | Train split         | Default Setting  | Difference                                       | GPU days        |
|-----------------------|---------------------|------------------|--------------------------------------------------|-----------------|
| Pseudo Labeling(50K)  | 50K unlabeled       | Detectron2       | 1. backbone no freeze.<br>2. turn on precise_bn. | $0.21 \times 8$ |
| Pseudo Labeling(100K) | 100K unlabeled      | Detectron2       | same as above                                    | $0.39 \times 8$ |
| Pseudo Labeling(500K) | 500K unlabeled      | Detectron2       | same as above                                    | $2.00 \times 8$ |
| STAC [17]             | 1-million unlabeled | STAC             | same as default                                  | $2.50 \times 8$ |
| Unbiased Teacher [15] | 1-million unlabeled | Unbiased Teacher | same as default                                  | $2.80 \times 8$ |

## 56 C More Experiments

57 We also compare SODA10M with other pre-training datasets (i.e., nuScenes [1], Waymo [18] and  
 58 BDD100K [24]) on object detection task (BDD100K [24] dataset) and instance segmentation task  
 59 (Cityscapes[6] dataset). As shown in Table 5, SODA10M performs better than other pre-training  
 60 datasets for the same self-supervised learning method.

Table 5: Detection results(%) of self-supervised models evaluated on BDD100K (B) dataset (with object detection task) and Cityscapes (C) dataset (with instance segmentation task).

| Pre-train Dataset | Method       | Faster-RCNN 1x (B) |      |      | RetinaNet 1x (B) |      |      | Mask-RCNN 1x (C) |      |
|-------------------|--------------|--------------------|------|------|------------------|------|------|------------------|------|
|                   |              | mAP                | AP50 | AP75 | mAP              | AP50 | AP75 | mAP              | AP50 |
|                   | random init  | 27.8               | 53.9 | 24.8 | 24.6             | 47.4 | 21.6 | 25.4             | 51.1 |
|                   | super. IN    | 31.8               | 59.3 | 29.5 | 30.6             | 56.7 | 28.0 | 32.9             | 59.6 |
| BDD100K [24]      | MoCo-v1 [11] | 31.4               | 58.6 | 29.0 | 29.9             | 55.6 | 27.4 | 31.8             | 58.7 |
|                   | MoCo-v2 [5]  | 31.3               | 58.5 | 28.5 | 30.5             | 56.7 | 27.9 | 32.0             | 58.8 |
| nuScenes [1]      | MoCo-v1 [11] | 31.1               | 58.5 | 28.6 | 29.5             | 55.3 | 26.9 | 31.4             | 58.0 |
|                   | MoCo-v2 [5]  | 30.9               | 58.0 | 28.3 | 30.0             | 55.9 | 27.5 | 31.5             | 58.9 |
| Waymo [18]        | MoCo-v1 [11] | 31.2               | 58.3 | 28.4 | 29.8             | 55.6 | 27.2 | 31.4             | 58.5 |
|                   | MoCo-v2 [5]  | 31.1               | 58.3 | 28.4 | 30.1             | 56.0 | 27.8 | 31.8             | 58.7 |
| SODA10M           | MoCo-v1 [11] | 31.5               | 58.7 | 28.7 | 30.6             | 57.0 | 28.2 | 33.9             | 60.6 |
|                   | MoCo-v2 [5]  | 31.4               | 58.5 | 28.9 | 30.9             | 56.9 | 28.6 | 33.7             | 61.0 |

61 Table 6 shows the performance of existing self-supervised methods evaluated on SODA10M labeled  
 62 set with a longer schedule and instance segmentation result on Cityscape [6] dataset. We observe that  
 63 dense contrastive methods (Detco, DenseCL) show excellent results when pre-trained on ImageNet [8],  
 64 but relatively poor pre-trained on SODA10M unlabeled set. For semantic segmentation performance  
 65 on Cityscapes with MoCov1, the model pre-trained on SODA10M even surpasses the one pre-trained  
 66 in ImageNet by 1.6%, further verifying the generalization ability of pre-training on SODA10M.

Table 6: Detection results(%) of self-supervised models evaluated on SODA10M labeled dataset (with object detection task) and Cityscapes (C) dataset (with instance segmentation task).

| Pre-train Dataset | Method       | Faster-RCNN 2x |      |      | RetinaNet 2x |      |      | Mask-RCNN 1x |          |
|-------------------|--------------|----------------|------|------|--------------|------|------|--------------|----------|
|                   |              | mAP            | AP50 | AP75 | mAP          | AP50 | AP75 | mAP (C)      | AP50 (C) |
|                   | random init  | 29.6           | 49.8 | 31.2 | 20.9         | 35.4 | 21.4 | 25.4         | 51.1     |
|                   | super. IN    | 38.7           | 61.0 | 41.5 | 35.0         | 57.0 | 36.0 | 32.9         | 59.6     |
| ImageNet [8]      | MoCo-v1 [11] | 39.3           | 60.9 | 42.5 | 35.9         | 57.4 | 37.3 | 32.3         | 59.3     |
|                   | MoCo-v2 [5]  | 40.4           | 62.7 | 43.6 | 37.4         | 59.1 | 39.3 | 33.9         | 60.8     |
|                   | SimCLR [4]   | 37.9           | 61.0 | 40.4 | 32.7         | 53.3 | 33.8 | 32.8         | 59.4     |
|                   | SwAV [3]     | 38.2           | 61.9 | 40.9 | 32.6         | 53.4 | 33.8 | 33.9         | 62.4     |
|                   | DetCo [22]   | 39.8           | 62.1 | 43.3 | 35.8         | 57.5 | 37.5 | 34.7         | 63.2     |
|                   | DenseCL [20] | 40.6           | 62.9 | 43.8 | 37.5         | 59.4 | 39.2 | 34.3         | 62.5     |
| SODA10M           | MoCo-v1 [11] | 38.7           | 60.9 | 41.1 | 33.4         | 56.2 | 34.3 | 33.9         | 60.6     |
|                   | MoCo-v2 [5]  | 39.1           | 60.8 | 42.6 | 33.6         | 56.2 | 34.8 | 33.7         | 61.0     |
|                   | SimCLR [4]   | 36.7           | 59.6 | 39.1 | 31.6         | 53.8 | 32.3 | 30.2         | 57.0     |
|                   | SwAV [3]     | 36.0           | 59.8 | 37.9 | 29.7         | 50.0 | 30.4 | 29.4         | 57.7     |
|                   | DetCo [22]   | 37.2           | 58.9 | 39.8 | 31.2         | 53.5 | 31.3 | 32.5         | 59.8     |
|                   | DenseCL [20] | 38.9           | 61.0 | 41.9 | 33.2         | 55.4 | 33.7 | 33.1         | 60.7     |

## 67 D Domain Illustration & Diversity Comparison

68 The distribution of each fine-grained domain in the validation set, testing set and unlabeled set is  
 69 shown in the Table 7, Table 8 and Table 9.

Table 7: The number of images in each domain in validation set.

|          | Daytime     |         |              | Night       |         |              |
|----------|-------------|---------|--------------|-------------|---------|--------------|
|          | City street | Highway | Country road | City street | Highway | Country road |
| Clear    | 383         | 961     | 63           | 137         | 167     | 312          |
| Overcast | 597         | 517     | 240          | 288         | 627     | 59           |
| Rainy    | 177         | 406     | 0            | 0           | 66      | 0            |

Table 8: The number of images in each domain in testing set.

|          | Daytime     |         |              | Night       |         |              |
|----------|-------------|---------|--------------|-------------|---------|--------------|
|          | City street | Highway | Country road | City street | Highway | Country road |
| Clear    | 490         | 2024    | 250          | 1591        | 498     | 146          |
| Overcast | 1216        | 1103    | 481          | 361         | 237     | 133          |
| Rainy    | 917         | 520     | 24           | 9           | 0       | 0            |

Table 9: The number of images in each domain in unlabeled set.

|              | Daytime |          |       |       | Night |          |       |       | Dawn/Dusk |          |       |       |
|--------------|---------|----------|-------|-------|-------|----------|-------|-------|-----------|----------|-------|-------|
|              | Clear   | Overcast | Rainy | Snowy | Clear | Overcast | Rainy | Snowy | Clear     | Overcast | Rainy | Snowy |
| City street  | 2247K   | 1483K    | 458K  | 140K  | 1274K | 582K     | 157K  | 71K   | 325K      | 215K     | 62K   | 22K   |
| Highway      | 506K    | 311K     | 114K  | 4K    | 186K  | 58K      | 24K   | 0.70K | 37K       | 27K      | 9K    | 0.17K |
| Country road | 499K    | 333K     | 69K   | 7K    | 170K  | 40K      | 12K   | 1K    | 38K       | 23K      | 5K    | 0.50K |
| Residential  | 146K    | 154K     | 29K   | 20K   | 61K   | 40K      | 7K    | 10K   | 9K        | 1K       | 2K    | 2K    |

70 More images in each domain are shown in Fig. 1.

## 71 E Acknowledgements

72 We thank our two data suppliers, named Testin<sup>1</sup> and Speechocean<sup>2</sup> (collected from King-IM-055),  
73 for helping us collect and annotate SODA10M dataset.

## 74 F Terms of Use and Licenses

75 **Description.** Huawei Technologies Co. Ltd (the ‘Organizers’ ,we", "us", and "our",) provides  
76 public access to and use of data that it collects and publishes. The data are organized in datasets  
77 (the “Datasets”) may be accessed at <https://sslad2021.github.io/index.html>. Any individual or entity  
78 (hereinafter You” or “Your”) with access to the Datasets free of charge subject to the terms of this  
79 agreement (hereinafter “Dataset Terms”). By using or downloading the Datasets, you are agreeing to  
80 comply with the Dataset Terms and any licensing terms referenced below. Use of any data derived  
81 from the Datasets, which may appear in any format such as tables and charts, is also subject to these  
82 Dataset Terms.

83 **Licenses.** Unless specifically labeled otherwise, these Datasets are provided to You under the terms  
84 of the Creative Commons Attribution-NonCommercial-ShareAlike 4.0 International Public License  
85 (“CC BY-NC-SA 4.0”), with the additional terms included herein. The CC BY-NC-SA 4.0 may be  
86 accessed at <https://creativecommons.org/licenses/by-nc-sa/4.0/legalcode>. When You download or  
87 use the Datasets from the Website or elsewhere, You are agreeing to comply with the terms of CC  
88 BY-NC-SA 4.0, and also agreeing to the Dataset Terms. Where these Dataset Terms conflict with  
89 the terms of CC BY-NC-SA 4.0, these Dataset Terms shall prevail. We reiterate once again that this  
90 dataset is used only for non-commercial purposes such as academic research, teaching, or scientific  
91 publications. We prohibits You from using the dataset or any derivative works for commercial  
92 purposes, such as selling data or using it for commercial gain.

93 **Sharing.** We prohibits You from distributing this dataset or modified versions. It is permissible to  
94 distribute derivative works in as far as they are abstract representations of this dataset (such as models  
95 trained on it or additional annotations that do not directly include any of our data).

<sup>1</sup><http://www.testin.cn>

<sup>2</sup><http://en.speechocean.com>



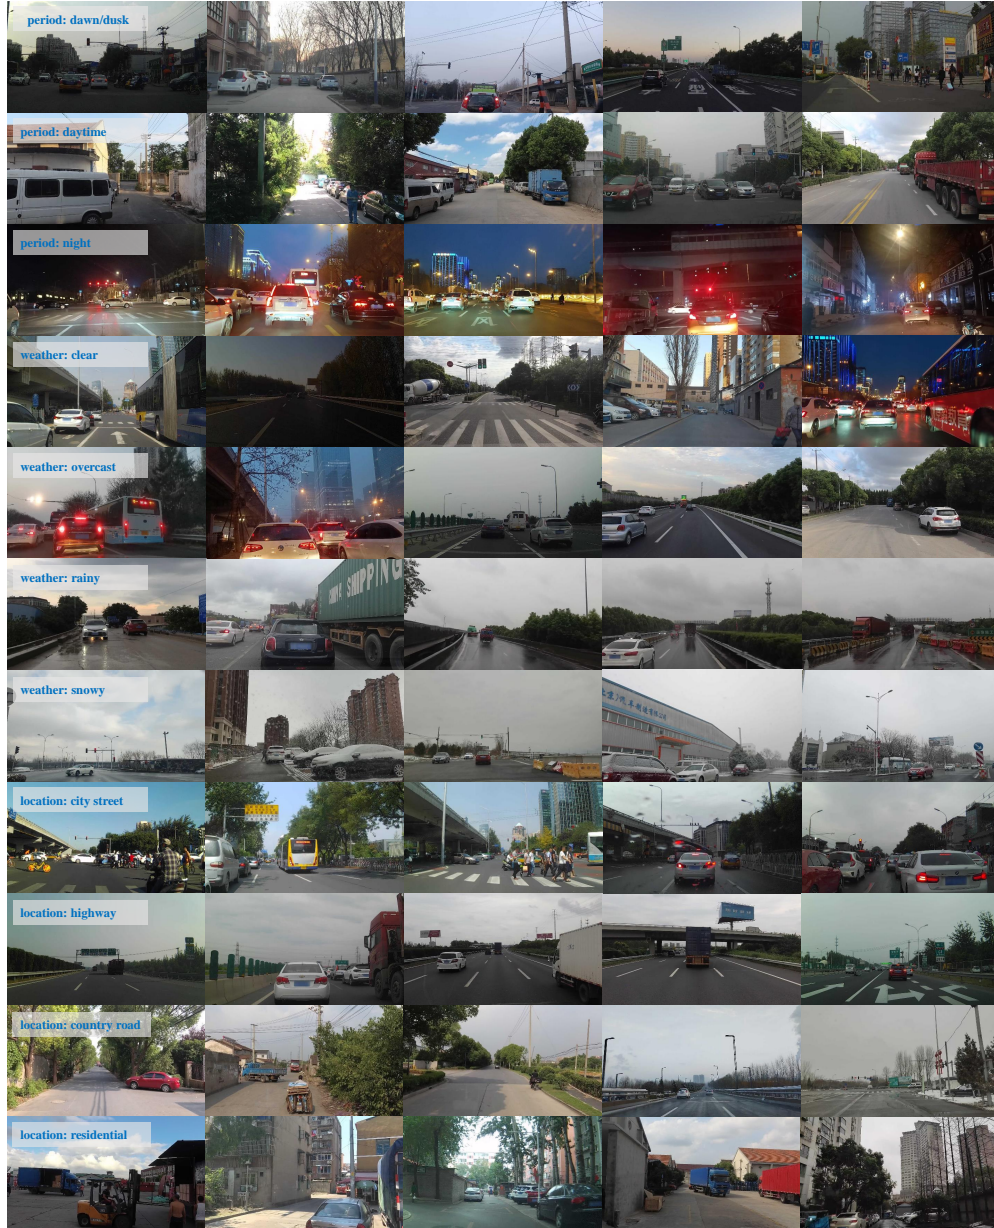

Figure 1: More examples of challenging environments in our dataset.

96 **Trademark.** All logos and trademarks used on this website are the properties of us or other third  
 97 parties as stated if applicable. No content provided on the website shall be deemed as granting  
 98 approval or the right to use any trademark or logo aforesaid by implication, lack of objection, or  
 99 other means without the prior written consent of us or any third party which may own the mark.  
 100 No individual shall use the name, trademark, or logo of us by any means without the prior written  
 101 consent of us.

102 **Privacy.** We will take reasonable care to remove or scrub personally identifiable information (PII)  
 103 including, but not limited to, faces of people and license plates of vehicles. Furthermore, We prohibits  
 104 You from using the Datasets in any manner to identify or invade the privacy of any person even when  
 105 such use is otherwise legal. If You have any privacy concerns, including to remove your name or  
 106 other PII from the Dataset, please contact us by sending an e-mail to xu.hang@huawei.com.

107 **Warranties.** The datasets and the website (including, without limitation, all content and modifications  
 108 of original datasets posted on the website) are provided “as is” and “as available” and without warranty  
 109 of any kind, express or implied, including, but not limited to, the implied warranties of title, non-  
 110 infringement, merchantability and fitness for a particular purpose, and any warranties implied by any  
 111 course of performance or usage of trade, all of which are expressly disclaimed. Without limiting  
 112 the foregoing, motionl does not warrant that: (a) the content or modifications to the dataset are  
 113 timely, accurate, complete, reliable or correct in their posted forms at the website; (b) the website  
 114 will be secure; (c) the website will be available at any particular time or location; (d) any defects  
 115 or errors will be corrected; (e) the website, content or any modifications are free of viruses or other  
 116 harmful components; or (f) the results of using the website will meet your requirements. Your use  
 117 of the website, the datasets, and any content is solely at your own risk. Any entity or individual  
 118 who suspects that the content on the website (including but not limited to the datasets posted on  
 119 the website) infringes upon legal rights or interests shall notify our contact xu.hang@huawei.com  
 120 in written form and provide the identity, ownership certification, associated link (url), and proof of  
 121 infringement. We will remove the content related to the alleged infringement by law upon receiving  
 122 the foregoing legal documents.

123 **Limitation of liability.** In no event shall motionl and its affiliates, or their directors, employees,  
 124 agents, partners, or suppliers, be liable under contract, tort, strict liability, negligence or any other  
 125 legal theory with respect to the website, the datasets, or any content or user submissions (i) for any  
 126 direct damages, or (ii) for any lost profits or special, indirect, incidental, punitive, or consequential  
 127 damages of any kind whatsoever.

128 **Applicable Law and Dispute Resolution.** Access and all related activities on or through the website  
 129 shall be governed by, construed, and interpreted in accordance with the laws of the People’s Republic  
 130 of China. You agree that any dispute between the parties arising out of or in connection with this  
 131 legal notice or your access and all related activities on or through this website shall be governed by a  
 132 court with jurisdiction in Shenzhen, Guangdong Province of the People’s Republic of China.

## 133 References

- 134 [1] H. Caesar, V. Bankiti, A. H. Lang, S. Vora, V. E. Liong, Q. Xu, A. Krishnan, Y. Pan, G. Baldan, and  
 135 O. Beijbom. nuscenes: A multimodal dataset for autonomous driving. In *CVPR*, 2020.
- 136 [2] Z. Cai and N. Vasconcelos. Cascade R-CNN: delving into high quality object detection. In *CVPR*, 2018.
- 137 [3] M. Caron, I. Misra, J. Mairal, P. Goyal, P. Bojanowski, and A. Joulin. Unsupervised learning of visual  
 138 features by contrasting cluster assignments. In *NeurIPS*, 2020.
- 139 [4] T. Chen, S. Kornblith, M. Norouzi, and G. Hinton. A simple framework for contrastive learning of visual  
 140 representations. In *ICLR*, 2020.
- 141 [5] X. Chen, H. Fan, R. Girshick, and K. He. Improved baselines with momentum contrastive learning.  
 142 *arXiv:2003.04297*, 2020.
- 143 [6] M. Cordts, M. Omran, S. Ramos, T. Rehfeld, M. Enzweiler, R. Benenson, U. Franke, S. Roth, and  
 144 B. Schiele. The cityscapes dataset for semantic urban scene understanding. In *CVPR*, 2016.
- 145 [7] E. D. Cubuk, B. Zoph, J. Shlens, and Q. V. Le. Randaugment: Practical automated data augmentation with  
 146 a reduced search space. In *Proceedings of the IEEE/CVF Conference on Computer Vision and Pattern  
 147 Recognition Workshops*, pages 702–703, 2020.
- 148 [8] J. Deng, W. Dong, R. Socher, L.-J. Li, K. Li, and L. Fei-Fei. Imagenet: A large-scale hierarchical image  
 149 database. In *CVPR*, 2009.
- 150 [9] D. Gordon, K. Ehsani, D. Fox, and A. Farhadi. Watching the world go by: Representation learning from  
 151 unlabeled videos. *arXiv:2003.07990*, 2020.
- 152 [10] J.-B. Grill, F. Strub, F. Altché, C. Tallec, P. Richemond, E. Buchatskaya, C. Doersch, B. Avila Pires, Z. Guo,  
 153 M. Gheslaghi Azar, B. Piot, k. kavukcuoglu, R. Munos, and M. Valko. Bootstrap your own latent: a new  
 154 approach to self-supervised learning. In *NeurIPS*, 2020.
- 155 [11] K. He, H. Fan, Y. Wu, S. Xie, and R. Girshick. Momentum contrast for unsupervised visual representation  
 156 learning. In *CVPR*, 2020.
- 157 [12] K. He, X. Zhang, S. Ren, and J. Sun. Deep residual learning for image recognition. In *CVPR*, 2016.

- 158 [13] T.-Y. Lin, P. Goyal, R. Girshick, K. He, and P. Dollár. Focal loss for dense object detection. In *ICCV*, 2017.
- 159 [14] T.-Y. Lin, M. Maire, S. Belongie, J. Hays, P. Perona, D. Ramanan, P. Dollár, and C. L. Zitnick. Microsoft  
160 COCO: common objects in context. In *ECCV*, 2014.
- 161 [15] Y.-C. Liu, C.-Y. Ma, Z. He, C.-W. Kuo, K. Chen, P. Zhang, B. Wu, Z. Kira, and P. Vajda. Unbiased teacher  
162 for semi-supervised object detection. In *ICLR*, 2021.
- 163 [16] S. Ren, K. He, R. Girshick, and J. Sun. Faster r-cnn: Towards real-time object detection with region  
164 proposal networks. In *NeurIPS*, 2015.
- 165 [17] K. Sohn, Z. Zhang, C.-L. Li, H. Zhang, C.-Y. Lee, and T. Pfister. A simple semi-supervised learning  
166 framework for object detection. *arXiv:2005.04757*, 2020.
- 167 [18] P. Sun, H. Kretzschmar, X. Dotiwalla, A. Chouard, V. Patnaik, P. Tsui, J. Guo, Y. Zhou, Y. Chai, B. Caine,  
168 V. Vasudevan, W. Han, J. Ngiam, H. Zhao, A. Timofeev, S. Ettinger, M. Krivokon, A. Gao, A. Joshi,  
169 Y. Zhang, J. Shlens, Z. Chen, and D. Anguelov. Scalability in perception for autonomous driving: Waymo  
170 open dataset. In *CVPR*, 2020.
- 171 [19] W. Wang, E. Xie, X. Li, D.-P. Fan, K. Song, D. Liang, T. Lu, P. Luo, and L. Shao. Pyramid vision  
172 transformer: A versatile backbone for dense prediction without convolutions. *arXiv:2102.12122*, 2021.
- 173 [20] X. Wang, R. Zhang, C. Shen, T. Kong, and L. Li. Dense contrastive learning for self-supervised visual  
174 pre-training. In *CVPR*, 2021.
- 175 [21] Y. Wu, A. Kirillov, F. Massa, W.-Y. Lo, and R. Girshick. Detectron2. [https://github.com/  
176 facebookresearch/detectron2](https://github.com/facebookresearch/detectron2), 2019.
- 177 [22] E. Xie, J. Ding, W. Wang, X. Zhan, H. Xu, Z. Li, and P. Luo. DetCo: Unsupervised contrastive learning  
178 for object detection. *arXiv:2102.04803*, 2021.
- 179 [23] Y. You, I. Gitman, and B. Ginsburg. Large batch training of convolutional networks. *arXiv preprint  
180 arXiv:1708.03888*, 2017.
- 181 [24] F. Yu, H. Chen, X. Wang, W. Xian, Y. Chen, F. Liu, V. Madhavan, and T. Darrell. BDD100K: A diverse  
182 driving dataset for heterogeneous multitask learning. In *CVPR*, 2020.
